# Supplementary material for: Scrutinizing Virus Genome Termini by High-Throughput Sequencing
Source: PubMed Central journal article supplement (PMC3896407; doi:10.1371/journal.pone.0085806), 2014-01-20
Supplement: pone.0085806.s001.pdf [file pone.0085806.s001.pdf]

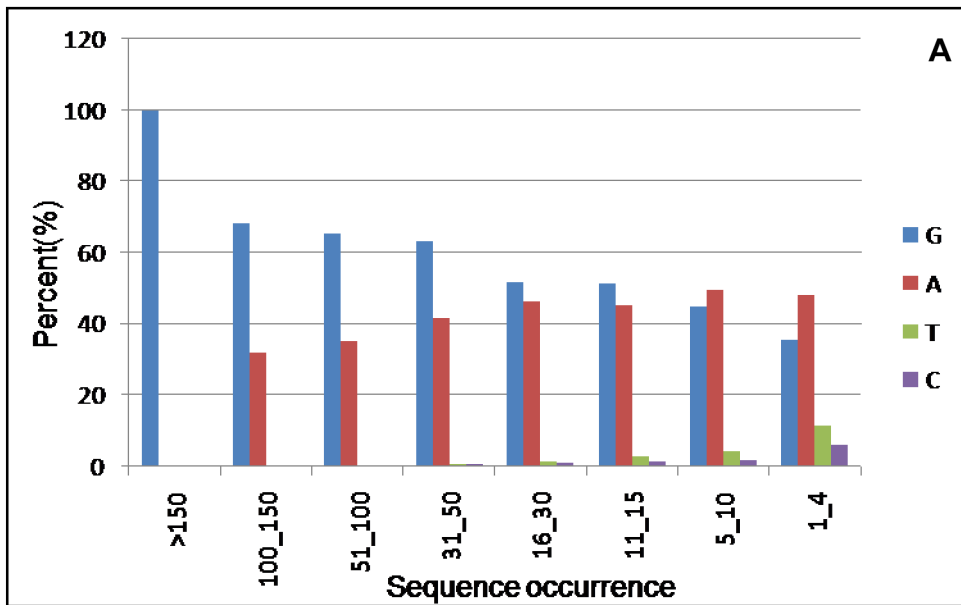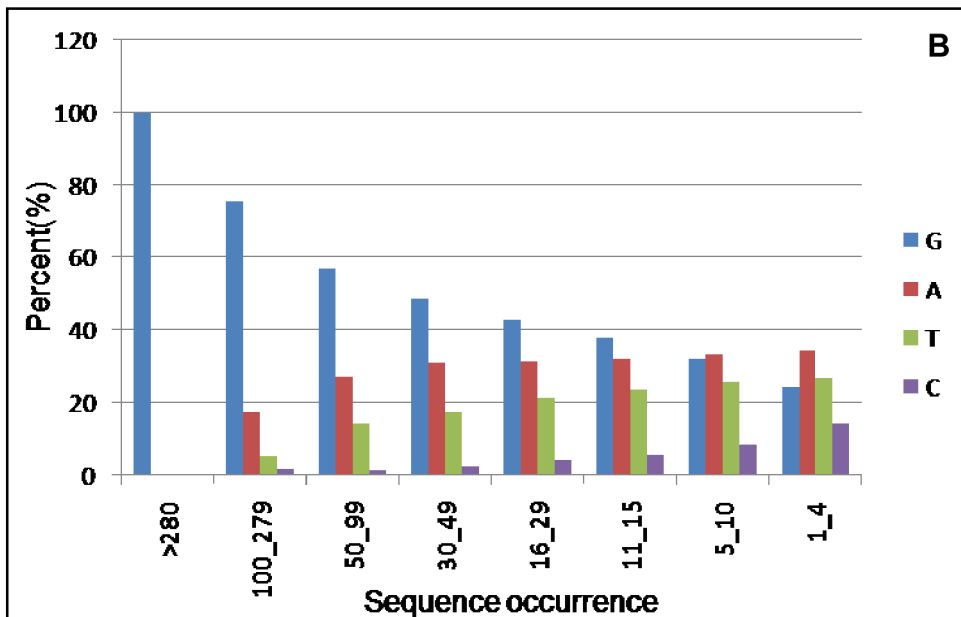

**Figure S1. Percentage of first bases in read sequences with/without adaptor tagged. (A)** read sequences with 1-4 occurrences has A, T, C, G constitution as the genome base composition (more evident in B), however, A and G comprised more than 90% of the first base for the sequences occurred more than 11 times, and there was never a T or C base for sequences occurred more than 100 times. **(B)** read sequences with 1-4 occurrences has A, T, C, G constitution as the genome base composition. A and G comprised more than 90% of the first base for the sequences occurred more than 100 times, and there was never a T or C base for sequences occurred more than 280 times.
