# Supplementary material for: Scrutinizing Virus Genome Termini by High-Throughput Sequencing
Source: PubMed Central journal article supplement (PMC3896407; doi:10.1371/journal.pone.0085806), 2014-01-20
Supplement: pone.0085806.s002.pdf [file pone.0085806.s002.pdf]

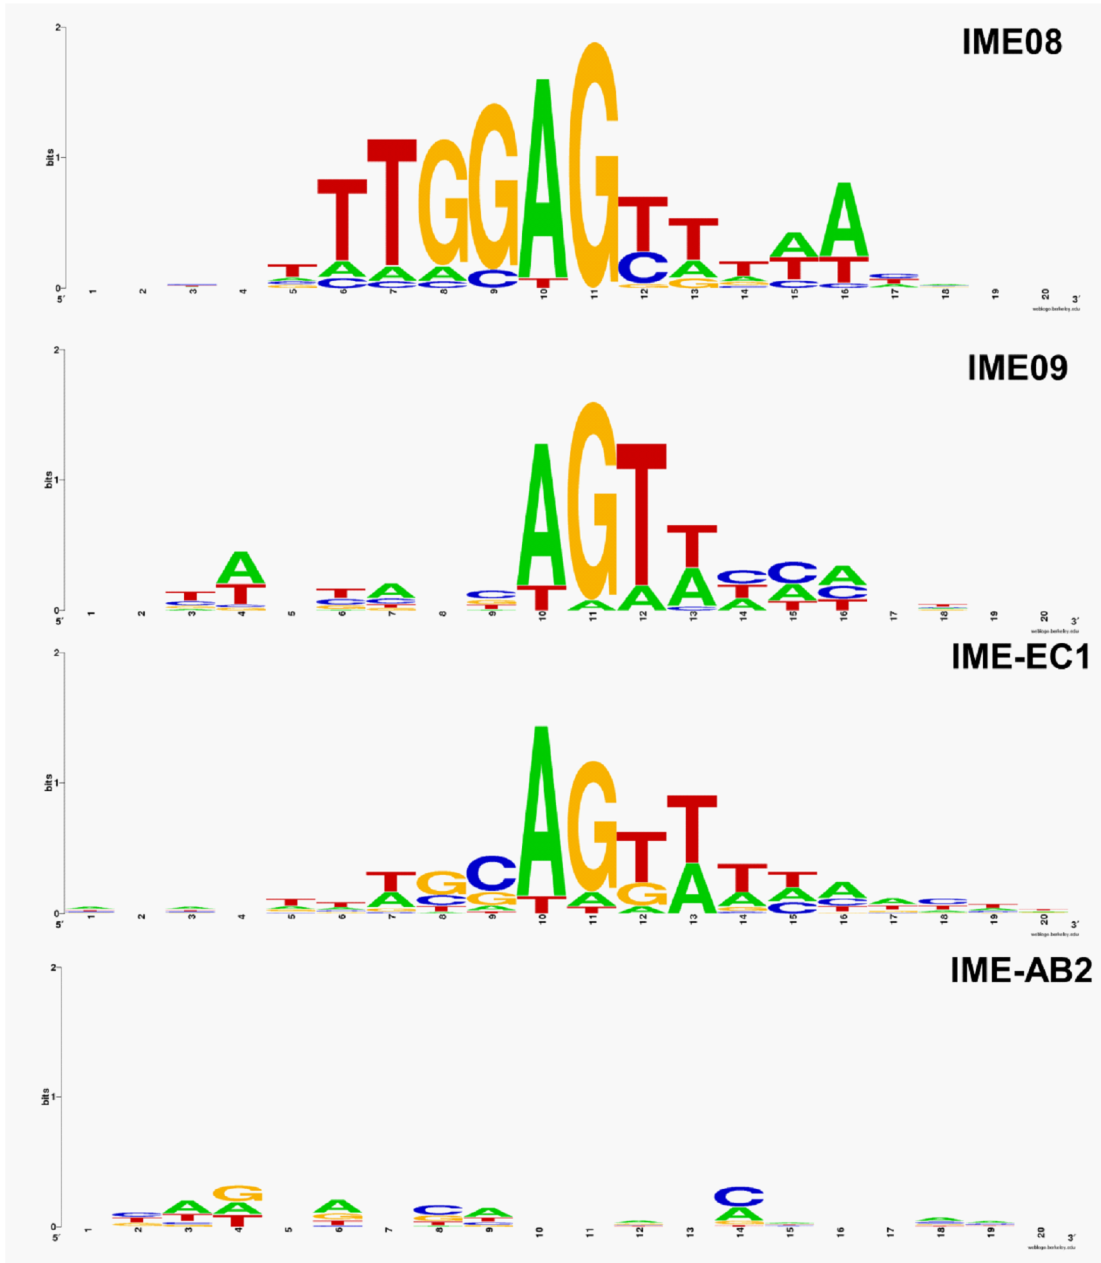

**Figure S2. the consensus sequences comparison of T4-like phages and *Acinetobacter baumannii* phage IME-AB2.** T4-like phage IME08, IME09, IME-EC1 were assumed aspartially permuted genome and *Acinetobacter baumannii* phage IME-AB2 was assumed as completely permuted circular genome which without any evident HFSs.
