# Supplementary material for: Scrutinizing Virus Genome Termini by High-Throughput Sequencing
Source: PubMed Central journal article supplement (PMC3896407; doi:10.1371/journal.pone.0085806), 2014-01-20
Supplement: pone.0085806.s003.pdf [file pone.0085806.s003.pdf]

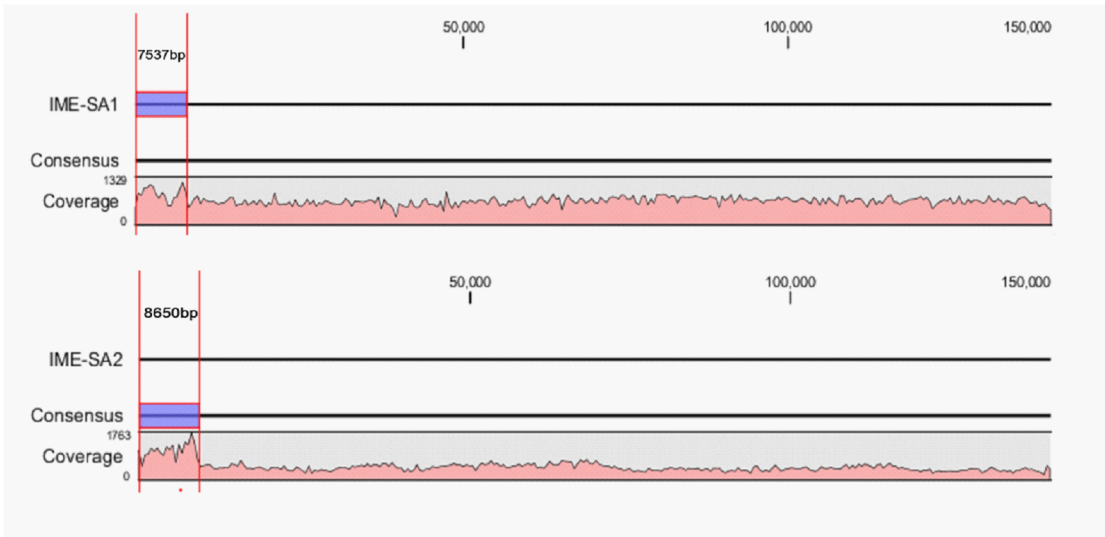

**Figure S3. The mapping of *S. aureus* phage IME-SA1 and IME-SA2.** *S. aureus* phage genome has about 8000bp long terminal repeats at the ends of their genome.
