# Supplementary material for: Scrutinizing Virus Genome Termini by High-Throughput Sequencing
Source: PubMed Central journal article supplement (PMC3896407; doi:10.1371/journal.pone.0085806), 2014-01-20
Supplement: pone.0085806.s004.pdf [file pone.0085806.s004.pdf]

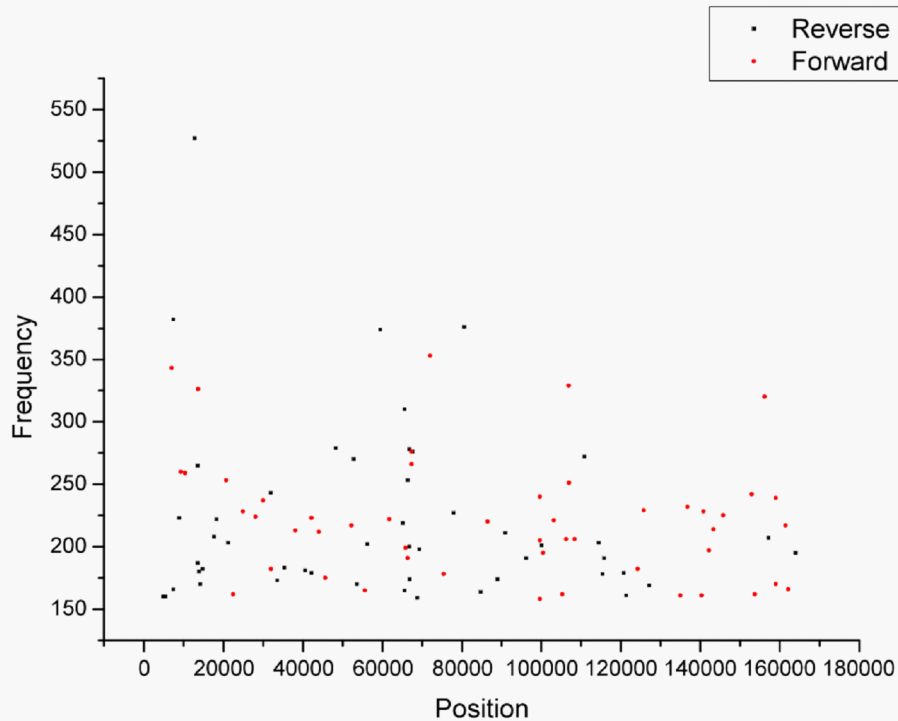

**Figure S4. Distribution of top 100 forward and reverse HFSs on the IME09 genome**
