# Supplementary material for: Scrutinizing Virus Genome Termini by High-Throughput Sequencing
Source: PubMed Central journal article supplement (PMC3896407; doi:10.1371/journal.pone.0085806), 2014-01-20
Supplement: pone.0085806.s006.pdf [file pone.0085806.s006.pdf]

**Table S2. The frequency percentage of IME09 reads with/without adaptor**

| frequency | reads/with<br>adaptor | percentage | reads/without<br>adaptor | percentage |
|-----------|-----------------------|------------|--------------------------|------------|
| 1         | 221234                | 61.40%     | 69938                    | 69.30%     |
| 2         | 55807                 | 15.50%     | 12096                    | 12%        |
| 3         | 29052                 | 8%         | 5349                     | 5.30%      |
| 4         | 16233                 | 4.50%      | 2985                     | 2.96%      |
| 5         | 9379                  | 2.60%      | 2025                     | 2%         |
| 6         | 5842                  | 1.60%      | 1445                     | 1.43%      |
| 7         | 3988                  | 1.10%      | 1095                     | 1.08%      |
| 8         | 2859                  | 0.80%      | 789                      | 0.78%      |
| 9         | 2053                  | 0.60%      | 679                      | 0.67%      |
| 10_99     | 13280                 | 3.78%      | 4422                     | 4.38%      |
| above 100 | 312                   | 0.09%      | 60                       | 0.06%      |
