# Supplementary material for: Scrutinizing Virus Genome Termini by High-Throughput Sequencing
Source: PubMed Central journal article supplement (PMC3896407; doi:10.1371/journal.pone.0085806), 2014-01-20
Supplement: pone.0085806.s007.pdf [file pone.0085806.s007.pdf]

**Table S3 The comparison between HFSs and consensus sequences of IME09 genome.**

| Sequences                                                  | Calculated results                     |
|------------------------------------------------------------|----------------------------------------|
| HFSs (calculated from raw reads)                           | 360049 (s)                             |
| Genome length                                              | 166499 (bp)                            |
| Consensus sequences (extracted by degenerate motif finder) | 25227 (forward: 12556, reverse: 12671) |
| Matched                                                    | 19215 (forward: 11031, reverse: 8184)  |
