# Supplementary material for: Scrutinizing Virus Genome Termini by High-Throughput Sequencing
Source: PubMed Central journal article supplement (PMC3896407; doi:10.1371/journal.pone.0085806), 2014-01-20
Supplement: pone.0085806.s008.pdf [file pone.0085806.s008.pdf]

**Table S4. The top 7 forward and reverse sequences in the phage IME-EC2 genome**

| Orientation | Frequency | Position <sup>1</sup> | Read sequence                  |
|-------------|-----------|-----------------------|--------------------------------|
| Reverse     | 695       | <b>38179</b>          | AAATCAGGCGTCGCGGATATCTCGCGTATG |
|             | 99        | 38177                 | ATCAGGCGTCGCGGATATCTCGCGTATGTA |
|             | 79        | 38180                 | GAAATCAGGCGTCGCGGATATCTCGCGTAT |
|             | 77        | 38181                 | AGAAATCAGGCGTCGCGGATATCTCGCGTA |
| Forward     | 66        | <b>37880</b>          | ATCAGCTTGATCTCCTCGGTGGTCATTGGC |
|             | 63        | 37873                 | CTCCGCCATCAGCTTGATCTCCTCGGTGGT |
|             | 62        | 37879                 | CATCAGCTTGATCTCCTCGGTGGTCATTGG |

<sup>1</sup>Reverse has definite HFSs with several base variation, while the HFSs on forward were not evident as reverse, which was 10 times with the forward, that indicating the reverse fixed while the forward was slightly random.

The direct repeat length = 38179 (R) – 37880 (F) = 299bp
